# Supplementary material
Source: MDPI journal article supplement (https://www.mdpi.com/2071-1050/11/11/3102)
Supplement: s1 [file s1]

Article

# Exploring tangible and intangible heritage and its resilience as a basis to understand the cultural landscapes of Saxon communities in southern Transylvania (Romania)

Ileana Pătru-Stupariu<sup>1,2</sup>, Marioara Pascu<sup>3</sup>, Matthias Bürgi<sup>4</sup>

1. Department of Regional Geography and Environment, Faculty of Geography, University of Bucharest, Bd. N. Bălcescu, 1, 010041 Bucharest, Romania, e-mail: [ileana.stupariu@geo.unibuc.ro](mailto:ileana.stupariu@geo.unibuc.ro)
2. Institute of Research of the University of Bucharest, ICUB; Transdisciplinary Research Centre Landscape-Territory-Information Systems, CeLTIS, Splaiul Independentei nr. 91-95, 050095 Bucharest, Romania e-mail: [ileana.stupariu@geo.unibuc.ro](mailto:ileana.stupariu@geo.unibuc.ro)
3. Faculty of Geography, Doctoral School Simion Mehedinti, University of Bucharest Bd. N. Bălcescu, 1, 010041 Bucharest, Romania e-mail: [marioara\\_pascu@yahoo.com](mailto:marioara_pascu@yahoo.com)
4. WSL Swiss Federal Institute for Forest, Snow and Landscape Research, Research Unit Land Change Science, Zürcherstrasse 111, 8903 Birmensdorf, Switzerland e-mail : [matthias.buergi@wsl.ch](mailto:matthias.buergi@wsl.ch)

Correspondence: [matthias.buergi@wsl.ch](mailto:matthias.buergi@wsl.ch)

---

**Supplementary Material:** Questions used in the interview

**Name:** not necessary

**Status:** resident/non-resident/tourist

**Ethnicity:** Romanian/German/Hungarian

**Age:**

**Study area:** counties Braşov and Sibiu

1. Questions
2. Q1. How long have you been living here?
3. Q2. What are the main traditional Saxon activities that were practised in your village in the past (with reference to crafts, handicrafts, agricultural activities, house construction techniques, commerce, culinary, etc.)?
4. Q3. What specific elements of the Saxon culture and civilization do you consider are still preserved in your community (with reference to the spoken dialect, language, folklore and material and immaterial traditions, construction materials and traditional architecture, structure and old buildings, education and publications in the mother tongue, etc.)?
5. Q4. What specific elements of the Saxon culture have completely disappeared?
6. Q5. What are the specific elements of the Saxon culture whose continuity in time is uncertain?
7. Q6. Are there any differences between the traditional Saxon life once practised in the village and the present one? If the answer is yes, what are these?
8. Q7. What transformations have appeared in time in the cultural landscape meant to disturb the dominant traditional features?
9. Q8. Do you personally or the local authorities try to revitalize any type of traditional activity? If the answer is yes, give examples.

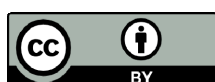

© 2019 by the authors. Submitted for possible open access publication under the terms and conditions of the Creative Commons Attribution (CC BY) license (<http://creativecommons.org/licenses/by/4.0/>).
